# Supplementary material for: Extensive public health initiatives drive the elimination of Aedes aegypti (Diptera, Culicidae) from a town in regional Queensland: A case study from Gin Gin, Australia
Source: PubMed Central journal article supplement (PMC9020727; doi:10.1371/journal.pntd.0010243), 2022-04-08

# PLOS Neglected Tropical Diseases

## Extensive public health initiatives drive the elimination of *Aedes aegypti* from a town in regional Queensland: a case study from Gin Gin, Australia.

--Manuscript Draft--

|                                                                                                                                                                                                                                                                                                                                                                                                                                                                                                      |                                                                                                                                                                                                                                                                                                                                                                                                                                                                                                                                                                                                                                                                                                                                                                                                                                                                                                                                                                                                                                                                                                                                                                                                                                                                                                                                                                                                                                                                                                                                                                                                                                                                                                                                                                                                         |
|------------------------------------------------------------------------------------------------------------------------------------------------------------------------------------------------------------------------------------------------------------------------------------------------------------------------------------------------------------------------------------------------------------------------------------------------------------------------------------------------------|---------------------------------------------------------------------------------------------------------------------------------------------------------------------------------------------------------------------------------------------------------------------------------------------------------------------------------------------------------------------------------------------------------------------------------------------------------------------------------------------------------------------------------------------------------------------------------------------------------------------------------------------------------------------------------------------------------------------------------------------------------------------------------------------------------------------------------------------------------------------------------------------------------------------------------------------------------------------------------------------------------------------------------------------------------------------------------------------------------------------------------------------------------------------------------------------------------------------------------------------------------------------------------------------------------------------------------------------------------------------------------------------------------------------------------------------------------------------------------------------------------------------------------------------------------------------------------------------------------------------------------------------------------------------------------------------------------------------------------------------------------------------------------------------------------|
| <b>Manuscript Number:</b>                                                                                                                                                                                                                                                                                                                                                                                                                                                                            | PNTD-D-21-00837                                                                                                                                                                                                                                                                                                                                                                                                                                                                                                                                                                                                                                                                                                                                                                                                                                                                                                                                                                                                                                                                                                                                                                                                                                                                                                                                                                                                                                                                                                                                                                                                                                                                                                                                                                                         |
| <b>Full Title:</b>                                                                                                                                                                                                                                                                                                                                                                                                                                                                                   | Extensive public health initiatives drive the elimination of <i>Aedes aegypti</i> from a town in regional Queensland: a case study from Gin Gin, Australia.                                                                                                                                                                                                                                                                                                                                                                                                                                                                                                                                                                                                                                                                                                                                                                                                                                                                                                                                                                                                                                                                                                                                                                                                                                                                                                                                                                                                                                                                                                                                                                                                                                             |
| <b>Short Title:</b>                                                                                                                                                                                                                                                                                                                                                                                                                                                                                  | Elimination of <i>Aedes aegypti</i> from Gin Gin, a regional town in Queensland, Australia                                                                                                                                                                                                                                                                                                                                                                                                                                                                                                                                                                                                                                                                                                                                                                                                                                                                                                                                                                                                                                                                                                                                                                                                                                                                                                                                                                                                                                                                                                                                                                                                                                                                                                              |
| <b>Article Type:</b>                                                                                                                                                                                                                                                                                                                                                                                                                                                                                 | Research Article                                                                                                                                                                                                                                                                                                                                                                                                                                                                                                                                                                                                                                                                                                                                                                                                                                                                                                                                                                                                                                                                                                                                                                                                                                                                                                                                                                                                                                                                                                                                                                                                                                                                                                                                                                                        |
| <b>Keywords:</b>                                                                                                                                                                                                                                                                                                                                                                                                                                                                                     | Elimination; <i>Aedes aegypti</i> ; Public Health; Community Engagement; Rainwater Tank; Population Genetics                                                                                                                                                                                                                                                                                                                                                                                                                                                                                                                                                                                                                                                                                                                                                                                                                                                                                                                                                                                                                                                                                                                                                                                                                                                                                                                                                                                                                                                                                                                                                                                                                                                                                            |
| <b>Abstract:</b>                                                                                                                                                                                                                                                                                                                                                                                                                                                                                     | <p><i>Aedes aegypti</i> is the primary vector of exotic arboviruses (dengue, chikungunya and Zika) in Australia. Once established across much of Australia, this mosquito species remains prevalent in central and northern Queensland. In 2011, <i>Ae. aegypti</i> was re-discovered in the town of Gin Gin, Queensland, by health authorities during routine larval surveillance. This town is situated on a major highway that provides a distribution pathway into the highly vulnerable and populous region of the state where the species was once common. Following the detection, larval habitat and adult control activities were conducted as a public health intervention to suppress the <i>Ae. aegypti</i> population and reduce the risk of exotic disease transmission. Importantly, genetic analysis revealed a homogenous cluster and small effective population vulnerable to elimination. By 2015, the population had expanded throughout the centre of the town. In response, a collaboration between research agencies and local stakeholders activated a council initiative in 2016 that included extensive community engagement, enhanced entomologic surveillance and vector control activities including the targeting of key containers such as unsealed rainwater tanks. Here we describe a model of the public health intervention which successfully reduced the <i>Ae. aegypti</i> population below detection thresholds, using source reduction, insecticides and novel, intensive genetic surveillance methods. This outcome has important implications for future elimination work in small towns in vulnerable regions and reinforces the longstanding benefits of a partnership model for public health-based interventions for invasive urban mosquito species.</p> |
| <b>Additional Information:</b>                                                                                                                                                                                                                                                                                                                                                                                                                                                                       |                                                                                                                                                                                                                                                                                                                                                                                                                                                                                                                                                                                                                                                                                                                                                                                                                                                                                                                                                                                                                                                                                                                                                                                                                                                                                                                                                                                                                                                                                                                                                                                                                                                                                                                                                                                                         |
| <b>Question</b>                                                                                                                                                                                                                                                                                                                                                                                                                                                                                      | <b>Response</b>                                                                                                                                                                                                                                                                                                                                                                                                                                                                                                                                                                                                                                                                                                                                                                                                                                                                                                                                                                                                                                                                                                                                                                                                                                                                                                                                                                                                                                                                                                                                                                                                                                                                                                                                                                                         |
| <p><b>Financial Disclosure</b></p> <p>Enter a financial disclosure statement that describes the sources of funding for the work included in this submission. Review the <a href="#">submission guidelines</a> for detailed requirements. View published research articles from <a href="#">PLOS NTDs</a> for specific examples.</p> <p>This statement is required for submission and <b>will appear in the published article</b> if the submission is accepted. Please make sure it is accurate.</p> | <p>NMEH was supported by National Health and Medical Research Council program grants 1037003 &amp; 1132412. Funders did not play any role in study design, data collection and analysis, decision to publish or preparation of the manuscript. <a href="https://www.nhmrc.gov.au/">https://www.nhmrc.gov.au/</a></p>                                                                                                                                                                                                                                                                                                                                                                                                                                                                                                                                                                                                                                                                                                                                                                                                                                                                                                                                                                                                                                                                                                                                                                                                                                                                                                                                                                                                                                                                                    |

### Unfunded studies

Enter: *The author(s) received no specific funding for this work.*

### Funded studies

Enter a statement with the following details:

- Initials of the authors who received each award
- Grant numbers awarded to each author
- The full name of each funder
- URL of each funder website
- Did the sponsors or funders play any role in the study design, data collection and analysis, decision to publish, or preparation of the manuscript?
- **NO** - Include this sentence at the end of your statement: *The funders had no role in study design, data collection and analysis, decision to publish, or preparation of the manuscript.*
- **YES** - Specify the role(s) played.

\* typeset

### Competing Interests

Use the instructions below to enter a competing interest statement for this submission. On behalf of all authors, disclose any [competing interests](#) that could be perceived to bias this work—acknowledging all financial support and any other relevant financial or non-financial competing interests.

This statement **will appear in the published article** if the submission is accepted. Please make sure it is accurate. View published research articles from [PLOS NTDs](#) for specific examples.

The authors have declared that no competing interests exist.

**NO authors have competing interests**

Enter: *The authors have declared that no competing interests exist.*

**Authors with competing interests**

Enter competing interest details beginning with this statement:

*I have read the journal's policy and the authors of this manuscript have the following competing interests: [insert competing interests here]*

\* typeset

This statement is **required** for submission and **will appear in the published article** if the submission is accepted. Please make sure it is accurate and that any funding sources listed in your Funding Information later in the submission form are also declared in your Financial Disclosure statement.

**Data Availability**

Authors are required to make all data underlying the findings described fully available, without restriction, and from the time of publication. PLOS allows rare exceptions to address legal and ethical concerns. See the [PLOS Data Policy](#) and [FAQ](#) for detailed information.

Yes - all data are fully available without restriction

A Data Availability Statement describing where the data can be found is required at submission. Your answers to this question constitute the Data Availability Statement and **will be published in the article**, if accepted.

**Important:** Stating 'data available on request from the author' is not sufficient. If your data are only available upon request, select 'No' for the first question and explain your exceptional situation in the text box.

Do the authors confirm that all data underlying the findings described in their manuscript are fully available without restriction?

**Describe where the data may be found in full sentences. If you are copying our sample text, replace any instances of XXX with the appropriate details.**

- If the data are **held or will be held in a public repository**, include URLs, accession numbers or DOIs. If this information will only be available after acceptance, indicate this by ticking the box below. For example: *All XXX files are available from the XXX database (accession number(s) XXX, XXX).*
- If the data are all contained **within the manuscript and/or Supporting Information files**, enter the following: *All relevant data are within the manuscript and its Supporting Information files.*
- If neither of these applies but you are able to provide **details of access elsewhere**, with or without limitations, please do so. For example:

*Data cannot be shared publicly because*

All relevant data are within the manuscript and its Supporting Information files.

of [XXX]. Data are available from the XXX Institutional Data Access / Ethics Committee (contact via XXX) for researchers who meet the criteria for access to confidential data.

The data underlying the results presented in the study are available from (include the name of the third party and contact information or URL).

- This text is appropriate if the data are owned by a third party and authors do not have permission to share the data.

\* typeset

Additional data availability information:

1 **Extensive public health initiatives drive the elimination of *Aedes aegypti* from a town in regional**  
2 **Queensland: a case study from Gin Gin, Australia.**

3 Brendan J. Trewin<sup>1</sup>, Brian L. Montgomery<sup>2</sup>, Tim P. Hurst<sup>2</sup>, Jason S. Gilmore<sup>2</sup>, Nancy M. Endersby<sup>3</sup>, and  
4 Greg Crisp<sup>2</sup>.

5 1. CSIRO, Health & Biosecurity, Queensland, Australia.

6 2. Queensland Health, Queensland, Australia.

7 3. University of Melbourne, Bio21 Institute, Victoria, Australia.

8 **Key words:** Elimination, *Aedes aegypti*, Public Health, Community Engagement, Rainwater Tank,  
9 Population Genetics

10 Abstract

11 *Aedes aegypti* is the primary vector of exotic arboviruses (dengue, chikungunya and Zika) in Australia.  
12 Once established across much of Australia, this mosquito species remains prevalent in central and  
13 northern Queensland. In 2011, *Ae. aegypti* was re-discovered in the town of Gin Gin, Queensland, by  
14 health authorities during routine larval surveillance. This town is situated on a major highway that  
15 provides a distribution pathway into the highly vulnerable and populous region of the state where the  
16 species was once common. Following the detection, larval habitat and adult control activities were  
17 conducted as a public health intervention to suppress the *Ae. aegypti* population and reduce the risk  
18 of exotic disease transmission. Importantly, genetic analysis revealed a homogenous cluster and small  
19 effective population vulnerable to elimination. By 2015, the population had expanded throughout the  
20 centre of the town. In response, a collaboration between research agencies and local stakeholders  
21 activated a council initiative in 2016 that included extensive community engagement, enhanced  
22 entomologic surveillance and vector control activities including the targeting of key containers such  
23 as unsealed rainwater tanks. Here we describe a model of the public health intervention which  
24 successfully reduced the *Ae. aegypti* population below detection thresholds, using source reduction,

25 insecticides and novel, intensive genetic surveillance methods. This outcome has important  
26 implications for future elimination work in small towns in vulnerable regions and reinforces the  
27 longstanding benefits of a partnership model for public health-based interventions for invasive urban  
28 mosquito species.

## 29 Introduction

30 *Aedes aegypti* (Linnaeus) (Diptera: Culicidae) is the primary vector of dengue fever, chikungunya and  
31 Zika on mainland Australia. Globally, *Ae. aegypti* is responsible for the rapid re-emergence and spread  
32 of viral diseases over the past 40 years (1). Currently, the number of annual global dengue cases is  
33 estimated to be 390 million (2), while the Zika epidemic in South America during 2015 was largely  
34 attributed to this species (3). *Aedes aegypti* exhibits several characteristics which make it one of the  
35 most invasive of all mosquito species. These include a lifecycle highly adapted to urban environments  
36 including; a penchant for human blood with multiple feedings per gonotrophic cycle, desiccation  
37 resistant eggs that can survive dry and winter conditions, and the utilization of domestic containers as  
38 larval habitat (4). Historically, these traits have enabled the species to spread widely within Australia,  
39 causing epidemics of dengue fever which have shaped public health policy (5).

40 *Aedes aegypti* is postulated to have been introduced into Australia around the time of British  
41 colonization, primarily through water storage on large sailing ships (6). By the early 1900s it had spread  
42 throughout the eastern seaboard as far south as the Victorian border (7). During the early part of the  
43 20<sup>th</sup> century, *Ae. aegypti* was responsible for large epidemics of dengue fever in Queensland, with  
44 some affecting up to 90% of populations in major urban centres such as Brisbane (7). With a rapid  
45 increase in dengue prevalence worldwide since the 1980s, Queensland observed a resurgence of the  
46 disease in north Queensland (8). The artificial introduction of the *Wolbachia* symbiont into *Ae. aegypti*  
47 populations in 2010 (9) has subsequently reduced the threat of autochthonous dengue outbreaks in  
48 northern Queensland (10).

49 Traditional *Ae. aegypti* management focuses on the removal of larval habitat and the application of  
50 insecticides to either control adults or larvae (11). In Australia, the distribution of *Ae. aegypti* has  
51 retracted into central Queensland following the adoption of reticulated water and intensive post-  
52 World War 2 public health interventions that removed rainwater tanks (a permanent source of larval  
53 habitat)(5, 12). Health authorities targeting larval habitat in the state's capital, Brisbane, led to the  
54 elimination of *Ae. aegypti* around 1957 and cessation of local dengue transmission since 1947 (5).  
55 More recently, the elimination of incursions of *Ae. aegypti* populations from Queensland into the  
56 Northern Territory (Tennant Creek and Groote Eylandt) were undertaken through effective  
57 community education, larval source reduction and targeted insecticide treatments and monitoring  
58 programs (13, 14). These same processes form the core strategy developed by the Queensland  
59 government to manage dengue transmission (11).

60 Central and southern Queensland regions remain vulnerable to exotic disease outbreaks where the  
61 wild-type *Ae. aegypti* (no *Wolbachia* infection) vector is abundant and interacts with infective  
62 travellers. During mid-2019, Rockhampton recorded the first dengue outbreak in over 60 years (15,  
63 16). It is unknown whether areas outside north Queensland are suitable for *Wolbachia* introduction  
64 (17, 18). Thus, traditional methods of mosquito control remain the strategy to reduce the risk of  
65 disease transmission by health authorities in southern Queensland regions (11). South East  
66 Queensland (SEQ) is highly vulnerable to the establishment of *Ae. aegypti* (19) and receives a high  
67 proportion of the annual numbers of viraemic travellers to Queensland (20). Developing regional  
68 capacity and capability alongside innovative strategies to eliminate invasive mosquito populations is  
69 particularly important when minimizing the risk of exotic disease transmission in large urban centres.

70 In 2011 *Ae. aegypti* was re-discovered in the small town of Gin Gin after 25 years through house-to-  
71 house surveys by state health authorities. The species was not identified in small surveys in 1996 and  
72 2006 (Brian Montgomery, Queensland Health, pers. comm.). Here we provide a public health  
73 perspective and document the extensive and enhanced entomological surveillance and control



74 activities required to eliminate *Ae. aegypti* from Gin Gin that serve as a calibration exercise for similar  
75 or larger-scale interventions.

## 76 Methods

77 **Chronology** of intervention and the various annual activities are described below.

### 78 **Summer 2011-2012. Initial Detection, Surveillance, Control and Community Engagement**

79 Gin Gin (24.9908° S, 151.9500° E) is a small town (1,053 population)(21) in the Wide Bay Burnett region  
80 of Queensland, Australia, located on a major highway into the state capital of Brisbane (Figure 1). In  
81 Queensland, local governments are responsible for monitoring and enforcing the **Public Health Act**  
82 **2005 (22) and Public Health Regulation 2005 (23)**. Following the detection of *Ae. aegypti* in Gin Gin  
83 during 2011, a **report was provided to the Bundaberg Regional Council (BRC) by Queensland Health**.

84 Recommendations to prevent the regional spread of the species included:

- 85 1) Elimination of the Gin Gin *Ae. aegypti* population to reduce the risk of dengue transmission  
86 (from viraemic travellers).
- 87 2) Surveying premises in which *Ae. aegypti* were detected (at least once a month for five months  
88 during summer), to determine whether *Ae. aegypti* was still present.
- 89 3) Surveying premises adjacent to those where *Ae. aegypti* were present to ensure these were  
90 also free of the species.

91 **BRC conducted** routine adult surveillance at and around the premises where *Ae. aegypti* was first  
92 collected (Figure 2A). **Oviposition traps (ovitrap)** and a network of BG Sentinel traps (24)(BGS;  
93 Biogents GmbH, Regensburg, Germany) for **adults were set at key premises and collected weekly**  
94 **between the 4<sup>th</sup> and 11<sup>th</sup> of May and the 4<sup>th</sup> of May and 25<sup>th</sup> of October 2011, respectively**. A  
95 population suppression program was implemented with BRC the lead agency and technical support  
96 provided by Queensland Health. Larval surveillance and control was undertaken over a two week

97 period (30<sup>th</sup> January to 17<sup>th</sup> February 2012). Council staff were trained in house-to-house inspection  
98 methodologies and larval surveillance techniques prior to an extensive larval

99

100

101

102

103

104

105

106

107

108

109

110

111

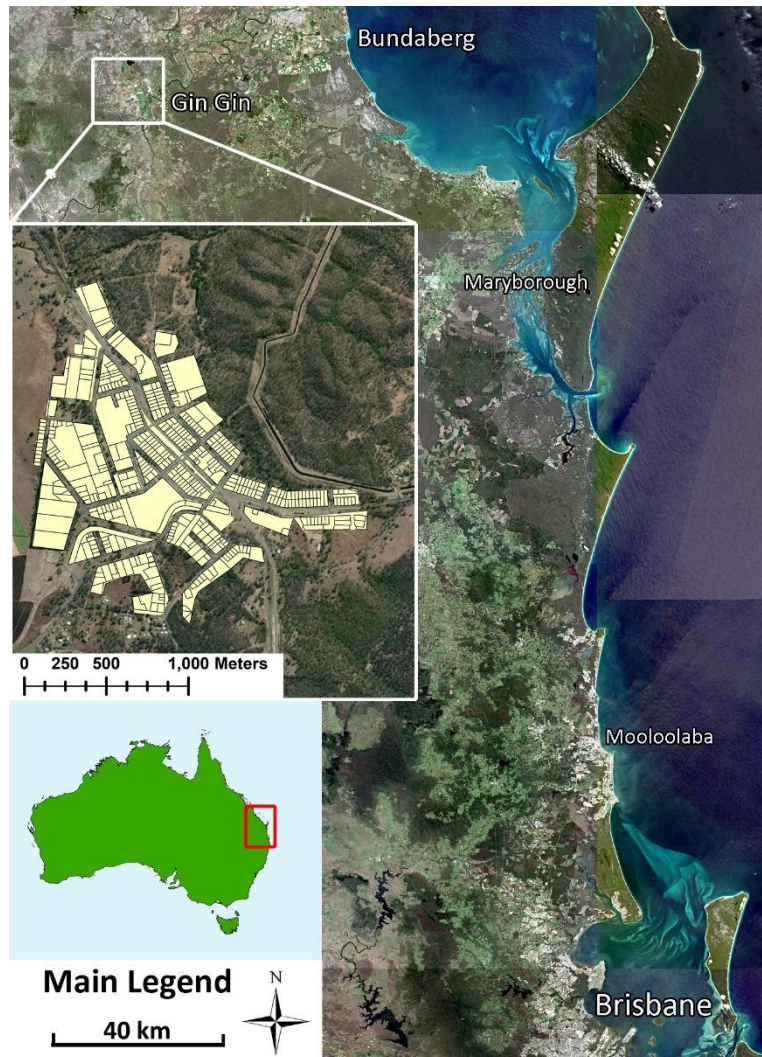

112 **Figure 1. Location of the town of Gin Gin relative to Brisbane and South East**  
113 **Queensland.** Location within Australia (bottom left) and Gin Gin town layout  
including scale (middle left). Map Source: Base Layer assembled from the Open  
Access Copernicus Australasia Regional Data Hub (38) and Australian map and  
residential features digitized from public domain cadastre data (37) in ArcGIS.

114 survey (480 premises). At each premises, verbal consent was obtained to conduct an inspection and  
115 if nobody was present the property was re-visited. Premises were scored by the Premise Condition  
116 Index (PCI)(25) and all natural and artificial containers holding water were checked for mosquito  
117 larvae. A sub-sample (6 to 12 larvae) from each positive larval habitat was placed into 80% ethanol for

118 species identification by microscopy. Adult surveillance was undertaken by BGS traps set fortnightly  
119 (10 premises, 22nd March – 14th May 2012) and ovitrap set weekly (14 premises; 21<sup>st</sup> March – 22<sup>nd</sup>  
120 May 2012).

121 Legal mechanisms in Queensland were activated to enable this intervention. Firstly, an ‘Authorised  
122 Inspection Program’ was implemented under the *Local Government Act 2009* to grant powers of entry  
123 to yards (not inside houses) by authorised officers without a resident’s consent. Secondly, all chemical  
124 treatment was consistent with label recommendations, conducted by or supervised by a licensed Pest  
125 Management Technician (PMT) and a *Pest Control Advice* (PCA) provided for each premises when  
126 treatment occurred. Larval control activities consisted of the removal and/or insecticide treatment of  
127 containers that contain or have the potential to contain *Ae. aegypti*. Prolink Pellets® containing the  
128 insect growth regulator (S)-methoprene were applied to containers that were either; hard-to-inspect,  
129 or were large or could not be emptied or removed (e.g. drain sumps, drums, tyres, tree holes). Prolink  
130 ProSand® was applied to leaf axils of bromeliads that retain water. To prevent the emergence of adult  
131 mosquitoes from large permanent water sources, Prolink XR Briquets® were used in damaged  
132 rainwater tanks or if their screens had been removed. For adult control, two lethal ovitrap (26) were  
133 set at each of the positive premises.

134 As part of the 2012 elimination strategy, a community engagement plan was established through  
135 targeted awareness campaigns and community engagement strategies including:

- 136 • a ‘Survey to eliminate *Aedes aegypti* to reduce a public health risk’ fact sheet,
- 137 • a media release on the ‘Gin Gin *Ae. aegypti* elimination program’,
- 138 • letter for premises that were positive for *Ae. aegypti*,
- 139 • letter for premises within a 100 m radius of premises that were positive for *Ae. aegypti* and,
- 140 • an information sheet regarding prevention and control of mosquito breeding in the yard.

141 A full description of 2012 surveillance, control and community engagement methods is documented  
142 in S1 Appendix.

143 **2012-2013. Genetic Assessment**

144 A population genetics study was undertaken by BRC to understand the likelihood of *Ae. aegypti*  
145 population elimination following removal of the extant population. Samples of larvae (n=39) collected  
146 from containers during house-to-house surveys (April 2013) were sent to University of Melbourne  
147 (Pest and Environmental Adaptation Research Group) and assessed at the genetic level for population  
148 structure using neutral **microsatellite markers** and compared with other published data on samples  
149 from central Queensland (27). Allelic richness calculated from 15 individuals to match the size of the  
150 smallest population in the central Queensland study)(A), gene diversity ( $H_e$ ), pairwise  $F_{ST}$  and  
151 inbreeding coefficient ( $F_{IS}$ ) were estimated using FSTAT 2.9.3.2. Mean effective population size ( $N_e$ )  
152 was estimated using ONeSamp 1.2. A Bayesian analysis to estimate the number of populations within  
153 the sample data was made using STRUCTURE (Version 2) (28). A burn-in length of 100 000 was chosen  
154 followed by 250 000 iterations and the simulation was run using the admixture model with allele  
155 frequencies uncorrelated among populations. The number of populations within the data ( $K$ ) is  
156 estimated by checking the fit of the model for a range of  $K$  values.  $K$  values of 1 to 8 were tested with  
157 five runs for each value of  $K$ . We used the method of Evanno *et al.* (29) to estimate the true  $K$  as  
158 applied in STRUCTURE Harvester.

159 **2013-2014. Surveillance Activities**

160 A larval and adult trapping survey was undertaken by Queensland Health (February to April 2014).  
161 House-to-house surveys were undertaken at **73 premises**, and **Gravid Aedes Traps (GAT)**(30) were  
162 placed within six of these for 13 days, serviced after seven days.

163 **2014-2015. Surveillance Activities**

164 A rainwater tank survey on eight rainwater tanks in central Gin Gin premises was performed in  
165 December 2014. Tank compliance and a larval sample was collected using the methods of **Knox *et al.***  
166 (31). Three ovitraps were set around unsealed rainwater tanks for four weeks.

167 An oviposition study (February - mid-April 2015) was undertaken at nine premises for ten weeks. Four  
168 ovitraps and a single GAT containing aged rainwater, a lucerne pellet (32) and water-proof sandpaper  
169 (80 grit) used as an oviposition substrate, were placed within the yard of each premises. Traps were  
170 serviced fortnightly, eggs counted, and larvae reared to fourth instar for identification to species via  
171 microscopy (33).

## 172 **2015-2016. Surveillance, Experiment, Traditional Control and Community Engagement**

173 A mark-release-recapture (MRR) study within Gin Gin was undertaken in 2016 to understand the  
174 distribution and movement of *Ae. aegypti* (34). Forty premises and 58 rainwater tanks were surveyed  
175 with the adult trapping methodology and rainwater tank non-compliance survey documented in  
176 Trewin *et al.* (34). As part of this study, extensive efforts were made to engage and educate the local  
177 community on the risk of *Ae. aegypti* breeding on their premises (S2 Appendix). Community  
178 engagement included the formation of a community reference group, town hall meeting, educational  
179 flyers and media activities. Homeowners were encouraged to clean-up surplus containers from yards  
180 and seal rainwater tanks. Prior to the MRR study, all non-compliant rainwater tanks as defined by  
181 regulatory standards (e.g. mesh size apertures to prevent entry or egress of mosquitoes) were sealed  
182 with new mesh screens or silicone in rust-related holes. Tanks unable to be sealed were treated with  
183 residual insecticides (Prolink XRBriquets®) and residents were encouraged to decommission high risk  
184 tanks. Traditional mosquito control was undertaken as part of the risk mitigation strategy including  
185 source reduction, residual insecticide treatments of Prolink ProSand® in bromeliads, and Prolink  
186 XRBriquets® in larger containers. Indoor residual spraying (35) was offered to residents once the  
187 experiment was complete (with two residents and one business opting to have their premises  
188 treated). Residents were compensated for their participation through an inexpensive voucher system  
189 for redeeming local produce. For 2016 community engagement and risk management and mosquito  
190 population suppression plans see S2 Appendix, S3 Appendix and S4 Appendix, respectively.

## 191 **2017-2018. Surveillance Activities**

192 Records for surveillance by BRC during 2016-2017 were unavailable for analyses. During summer  
193 2017-2018 adult surveys using BGS traps for five weeks across five premises in late summer and  
194 classified adults to species by microscopy.

#### 195 **2018-2019. Surveillance Activities**

196 As part of a larger regional population genetics survey, BGS and ovitrapping was undertaken in Gin  
197 Gin for ten weeks (February until May 2018), in six houses previously positive to *Ae. aegypti*. A single  
198 BGS trap and four ovitraps were placed in the yard of each house and serviced weekly. Concurrent  
199 BGS surveillance was undertaken by BRC (five weeks across five premises) in late summer. Larvae  
200 (reared to 4th instar) and adults were identified to species via microscopy (33).

#### 201 **2019-2020. Presence-absence surveillance: Rapid Surveillance for Vector Presence Survey**

202 To interrogate the detection threshold indicated by negative records from the previous three  
203 summers, a highly sensitive *Ae. aegypti* survey was conducted using an innovative method that links  
204 ovitrap samples to molecular diagnostics. Rapid Surveillance for Vector Presence (RSVP) (36) can  
205 rapidly detect *Ae. aegypti* nucleic acids by using real-time reverse transcription polymerase chain  
206 reaction (RT-PCR) to screen large amounts of genetic material. Large volumes of endemic species can  
207 be processed by aggregating egg samples in cohorts (<5000 eggs) that typically are sourced from  
208 multiple ovitraps. The sensitivity of RSVP facilitates the efficiency of a regional presence-absence  
209 survey of target invasive species over large spatial and temporal scales, particularly when they are  
210 expected to be absent or in very low numbers. Since 2017, RSVP has been offered to regional councils  
211 in and near SEQ by Queensland Health on a seasonal basis. Premises across the town were selected  
212 to ensure all high-risk residential blocks within Gin Gin were sampled for the presence of *Ae. aegypti*.  
213 Twenty-one premises were surveyed with a single ovitrap placed within the yard and eggs collected  
214 fortnightly for two periods of four weeks (total 8 weeks from February until March 2020).

#### 215 **Mapping**

216 Trapping and larval surveillance results are mapped at the **block** scale, the spatial unit under which  
217 *Ae. aegypti* is optimally targeted due to limited dispersal abilities (34), while also preserving the  
218 privacy of individual premises where surveillance was undertaken. All shapefile maps were digitized  
219 in ArcGIS by outlining residential features (blocks, roads, highways) and then overlaying public domain  
220 cadastre data (37). Base layer imagery of South East Queensland region sourced from the open access  
221 Copernicus Australasian Regional Data Hub (38). Trap days is a quantitative measure of the number of  
222 traps placed in the environment multiplied by the number of days present when the population was  
223 surveyed (39) over a summer season (November until May).

## 224 Results

### 225 **2011-2012. Initial Detection and Elimination Strategy**

226 *Aedes aegypti* was first detected in a single property in central Gin Gin by a routine Queensland Health  
227 house-to-house survey in 2011 (Figure 2A). Mosquito surveillance and suppression activities  
228 subsequent to detection revealed *Ae. aegypti* in 2.3% (11/473) of premises throughout central Gin Gin  
229 (Figure 2B), representing a modest increase from the 1986 detections (3 premises). During larval  
230 surveys, a total of 5,035 wet and 724 dry containers were observed, an average of 12 larval habitat  
231 sites per premises. Mosquitoes were present in approximately 40% and 11% of all premises and wet  
232 containers, respectively (Table 2). The most prevalent container category positive for *Ae. aegypti*  
233 (35%) were garden accoutrements such as plant pots and saucers, birdbaths, buckets and striking pots  
234 (S1 Appendix Table 5). Three hundred and forty-seven rainwater tanks (73.4% of premises inspected)  
235 were recorded during the survey, with most tanks containing water. Due to difficulty of access, not all  
236 tanks were inspected or sampled. Four tanks were positive for mosquito larvae and one was positive  
237 for *Ae. aegypti* larvae. Premises **previously positive for *Ae. aegypti*** remained positive in one of the 14  
238 ovitrap locations and one of three BGS trap locations over the same ten-week period.

239 **Table 1. Prevalence of water bearing containers and number with *Aedes aegypti* juvenile stages**  
 240 **in Gin Gin, Australia.** Collected during town-wide surveillance activities summer 2011-12.

| Category                 | Total (%)    | Wet (%)      | <i>Ae. aegypti</i> |
|--------------------------|--------------|--------------|--------------------|
|                          |              |              | Present (%)        |
| Garden Accoutrement      | 1,796 (31.2) | 1,408 (28.0) | 6 (35.3)           |
| Discarded Household Item | 460 (8.0)    | 409 (8.1)    | 4 (23.5)           |
| Domestic Use Container   | 259 (4.5)    | 246 (4.9)    | 4 (23.5)           |
| Recreational Item        | 63 (1.1)     | 62 (1.2)     | 1 (5.9)            |
| Water Storage            | 162 (2.8)    | 157 (3.1)    | 1 (5.9)            |
| <b>Rubbish</b>           | 200 (3.5)    | 159 (3.2)    | 0                  |
| Building Fixture         | 224 (3.9)    | 205 (4.1)    | 0                  |
| Natural Habitat          | 2,248 (39.0) | 2,044 (40.6) | 0                  |
| <b>Total</b>             | <b>5,759</b> | <b>5,035</b> | <b>17</b>          |

241

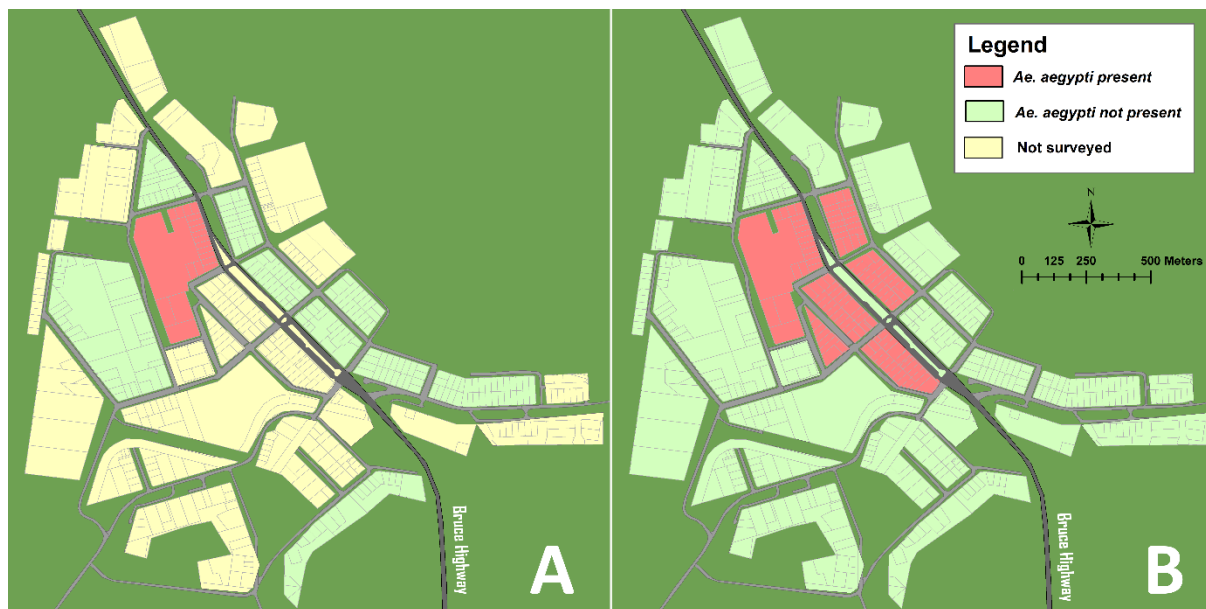

242

243 **Figure 2. Detection block 2011 (A) and town-wide larval surveys 2012 (B) of *Aedes aegypti* in Gin Gin.** Red indicates blocks  
 244 where *Aedes aegypti* were detected, green where no *Ae. aegypti* were found to be present, and yellow blocks were not  
 245 surveyed.



246 **2012-2013. Surveys and Genetic Assessment**

247 *Aedes aegypti* was present across six blocks in central Gin Gin, collected from yard containers and one  
 248 rainwater tank (S5 Appendix, S6 Appendix Fig 1). The thirty-nine samples collected showed the lowest  
 249 degree of allelic richness (i.e. low number of microsatellite alleles adjusted for sample size) and lowest  
 250 gene diversity of the samples tested, which included a range of locations in central and northern  
 251 Queensland (Table 3). The inbreeding coefficient for the Gin Gin sample was moderate, but significant  
 252 (Table 3). Pairwise  $F_{ST}$  estimates between sample localities revealed significant population  
 253 differentiation between the samples of *Ae. aegypti* from Gin Gin and all other localities (Table 4). The  
 254 only samples not significantly differentiated from each other were from Gordonvale and Yorkeys  
 255 Knob.

256 Effective population size in Gin Gin, estimated by ONEsamp, was small and similar to most samples  
 257 from central Queensland (Table 2; mean =19.21, median =19.15, lower 95% CL =13.58, upper 95% CL  
 258 =28.04). STRUCTURE analysis gave an estimate of six genetic clusters (K) within the complete dataset  
 259 from Queensland, using both the highest log probability of the data and the  $\Delta K$  method (Evanno *et al.*  
 260 (29)) (S5 Appendix Table 2). For K = 6, all locations showed some degree of admixture, but for Gin Gin,  
 261 admixture was minimal (S5 Appendix Fig 1). Yorkeys Knob and Gordonvale from north Queensland  
 262 were grouped together; Longreach, Bluff, Duinga and Emerald were separate clusters, while other  
 263 locations showed a high degree of admixture (S5 Fig 1).

264 **Table 3. Genetic diversity over seven microsatellite loci for *Aedes aegypti* from eleven locations in Queensland,**  
 265 **Australia.** Results grouped in regions (north Queensland - *NQL*, and central Queensland - *CQL*) with: sample size  
 266 (N), allelic richness calculated from 15 individuals (A), gene diversity (He), inbreeding coefficient ( $F_{IS}$ ), mean  
 267 effective population size (Ne) and 95% confidence limits (in parentheses) (Table modified from Rašić *et al.* 2014  
 268 to include data from Gin Gin).

269

| Name | Code | Latitude | Longitude | N | A | He | $F_{IS}$ | Ne |
|------|------|----------|-----------|---|---|----|----------|----|
|------|------|----------|-----------|---|---|----|----------|----|

---

**North QLD**

|              |   |          |          |    |      |       |       |             |
|--------------|---|----------|----------|----|------|-------|-------|-------------|
| Yorkeys Knob | 1 | -16.8094 | 145.7226 | 30 | 3.38 | 0.544 | 0.125 | 43 (22-146) |
| Gordonvale   | 2 | -17.0966 | 145.7787 | 28 | 3.15 | 0.494 | 0.164 |             |
| Ingham       | 3 | -18.6533 | 146.1604 | 15 | 3.00 | 0.519 | 0.083 | 15 (10-37)  |

---

**Central QLD**

|             |    |          |          |    |      |       |        |             |
|-------------|----|----------|----------|----|------|-------|--------|-------------|
| Rockhampton | 4  | -23.3795 | 150.4995 | 30 | 3.13 | 0.479 | 0.134  | 33 (19-101) |
| Mt Morgan   | 5  | -23.6449 | 150.3889 | 34 | 2.75 | 0.442 | 0.108  | 19 (10-57)  |
| Duaringa    | 6  | -23.7110 | 149.6710 | 29 | 3.19 | 0.457 | 0.079  | 24 (14-72)  |
| Bluff       | 7  | -23.5786 | 149.0703 | 32 | 2.78 | 0.477 | 0.054  | 25 (15-90)  |
| Emerald     | 8  | -23.5162 | 148.1610 | 28 | 3.23 | 0.426 | 0.054  | 65 (33-282) |
| Capella     | 9  | -23.0837 | 148.0245 | 21 | 2.98 | 0.461 | -0.078 | 22 (14-63)  |
| Longreach   | 10 | -23.4433 | 144.2509 | 28 | 3.07 | 0.443 | -0.063 | 27 (17-105) |

---

|                |    |           |          |    |      |       |       |            |
|----------------|----|-----------|----------|----|------|-------|-------|------------|
| <b>Gin Gin</b> | 11 | -24.98946 | 151.9500 | 39 | 2.51 | 0.329 | 0.093 | 19 (14-28) |
|----------------|----|-----------|----------|----|------|-------|-------|------------|

---

270

271 **Table 4. Pairwise FST estimates for eleven samples of *Aedes aegypti* from Queensland, Australia.** Bold indicates no  
272 significant differentiation (Table modified from Rašić *et al.* 2014 to include data from Gin Gin).

|                       | 1             | 2      | 3      | 4      | 5      | 6      | 7      | 8      | 9      | 10 | 11 |
|-----------------------|---------------|--------|--------|--------|--------|--------|--------|--------|--------|----|----|
| <b>1 Yorkeys Knob</b> | 0             |        |        |        |        |        |        |        |        |    |    |
| <b>2 Gordonvale</b>   | <b>0.0126</b> | 0      |        |        |        |        |        |        |        |    |    |
| <b>3 Ingham</b>       | 0.0420        | 0.0507 | 0      |        |        |        |        |        |        |    |    |
| <b>4 Rockhampton</b>  | 0.0458        | 0.0272 | 0.0831 | 0      |        |        |        |        |        |    |    |
| <b>5 Mt Morgan</b>    | 0.0786        | 0.0789 | 0.1191 | 0.0283 | 0      |        |        |        |        |    |    |
| <b>6 Duaringa</b>     | 0.1117        | 0.1012 | 0.1589 | 0.0423 | 0.0499 | 0      |        |        |        |    |    |
| <b>7 Bluff</b>        | 0.0619        | 0.0759 | 0.0683 | 0.0871 | 0.1174 | 0.1541 | 0      |        |        |    |    |
| <b>8 Emerald</b>      | 0.0548        | 0.0734 | 0.0972 | 0.0527 | 0.0616 | 0.1093 | 0.1333 | 0      |        |    |    |
| <b>9 Capella</b>      | 0.1131        | 0.1263 | 0.1172 | 0.0910 | 0.1028 | 0.0611 | 0.0970 | 0.1533 | 0      |    |    |
| <b>10 Longreach</b>   | 0.0649        | 0.0708 | 0.1277 | 0.0567 | 0.0651 | 0.0573 | 0.1599 | 0.0735 | 0.1215 | 0  |    |

273

274 **Summary of Surveillance Activities 2013-2020.**

275 Six positive premises were detected in 2013-2014 (five from larval surveys and from a GAT at a  
276 separate premises, across five residential blocks in north-eastern Gin Gin (S6 Appendix Fig 2). Six of  
277 eight rainwater tanks inspected were non-compliant with regulations, but not sampled for *Ae. aegypti*.

278 Larval surveys (2014-2015) suggest *Ae. aegypti* distribution had expanded southward in residential  
279 blocks, with five of 10 positive (S6 Appendix Fig 3). The most extensive trapping effort (applying GAT  
280 and ovitraps) was undertaken during this season, consisting of 3,150 trap days over a ten-week period  
281 (Table 5). During this survey, all non-compliant rainwater tanks were positive (three of three) for *Ae.*  
282 *aegypti*, while three compliant tanks were negative (Table 5). Surveillance (2015-2016) that included  
283 a rainwater tank survey for compliance and background *Ae. aegypti* population monitoring during a  
284 mark, release, recapture (MRR) experiment is documented in Trewin *et al.* (34). Wild (unmarked) *Ae.*  
285 *aegypti* were collected in twelve of 26 premises (46%), while four of ten rainwater tanks sampled were  
286 positive (S6 Appendix Fig 4).

287 Surveillance activities for 2016-2017 summer season are unavailable, however, this was the first  
288 season that BRC reported *Ae. aegypti* to be absent from Gin Gin. Likewise, a five-week BRC survey  
289 with five BGS traps in five premises during the 2017-2018 summer season revealed *Ae. aegypti* to be  
290 absent (S6 Appendix Fig 5). During the 2018-2019 season both the BRC and the Commonwealth  
291 Scientific and Industrial Research Organisation (CSIRO) undertook trapping surveys at ten premises  
292 over a ten-week period, representing 1,365 trap days with both BGS and ovitraps, with no *Ae. aegypti*  
293 detected (Table 5, S6 Appendix Fig 6).

294 Enhanced RSVP ovitrap surveillance (2019-2020) did not detect *Ae. aegypti* in any of the blocks where  
295 *Ae. aegypti* had been present previously (S6 Appendix Fig 7). A total of 21 premises were surveyed  
296 across 13 different blocks for a total of 1,176 trap days across eight weeks (Table 5). A summary of

297 blocks positive to *Ae. aegypti* previous to 2017 suggest the species distribution was primarily in central  
 298 areas within the town (Figure 4A), while surveillance effort of 3,591 trap days during the period from  
 299 2017 to 2020 suggests the species is no longer present in high-risk central blocks (Table 5, Fig 4B).

300

301 **Table 5. Summary results of *Aedes aegypti* surveillance activities in the town of Gin Gin, Australia.** Trap days  
 302 indicate the number of traps placed in the town multiplied by the number of days each sampled over a summer  
 303 season (November-May).

| Summer<br>Season | Survey<br>Type   | Survey               |                          |                  |              |                       |
|------------------|------------------|----------------------|--------------------------|------------------|--------------|-----------------------|
|                  |                  | Premises<br>Surveyed | Positive<br>Premises (%) | Period<br>(days) | Trap<br>Days | Positive<br>Traps (%) |
| 2012-2013        | Larval           | na                   | 14 (na)                  | 2                | na           | na                    |
| 2013-2014        | Larval           | 73                   | 5 (7)                    | 2                | na           | na                    |
|                  | GAT              | 6                    | 1 (17)                   | 13               | 78           | 1 (17)                |
| 2014-2015        | Ovitrap          | 9                    | 4 (44)                   | 70               | 2,520        | 6 (3)                 |
|                  | GAT              | 9                    | 2 (22)                   | 70               | 630          | 5 (11)                |
|                  | Rainwater Tank   | 7                    | 3 (43)                   | 70               | na           | na                    |
| 2015-2016        | BG Trap          | 26                   | 12 (46)                  | 13               | 455          | 17 (49)               |
|                  | GAT              | 26                   | 2 (8)                    | 13               | 910          | 10 (14)               |
|                  | Rainwater Tank   | 10                   | 4 (40)                   | 1                | na           | na                    |
| 2016-2017        | Data Unavailable |                      |                          |                  |              |                       |
| 2017-2018        | BG Trap          | 5                    | 0 (0)                    | 35               | 175          | 0 (0)                 |
| 2018-2019        | BG Trap          | 10                   | 0 (0)                    | 105              | 560          | 0 (0)                 |
|                  | Ovitrap          | 6                    | 0 (0)                    | 70               | 1,680        | 0 (0)                 |
| 2019-2020        | Ovitrap (RSVP)   | 21                   | 0 (0)                    | 56               | 1,176        | 0 (0)                 |

304

305

306

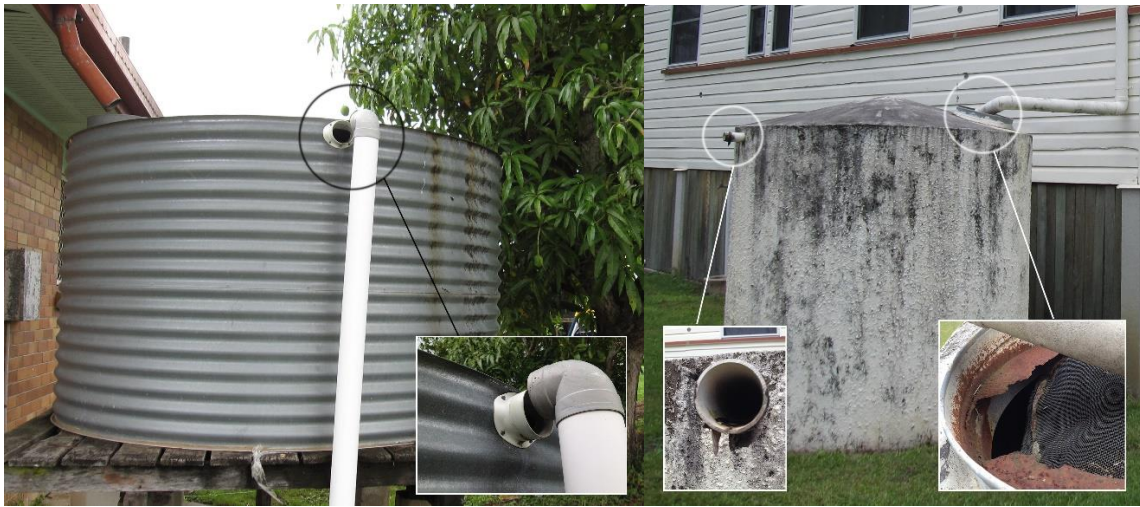

307

308 **Figure 3. Non-compliant rainwater tanks (with anti-mosquito regulations) identified in Gin Gin containing *Aedes aegypti*.**

309 Inserts show detailed views of exposed overflows and rusted inflow sieves.

310

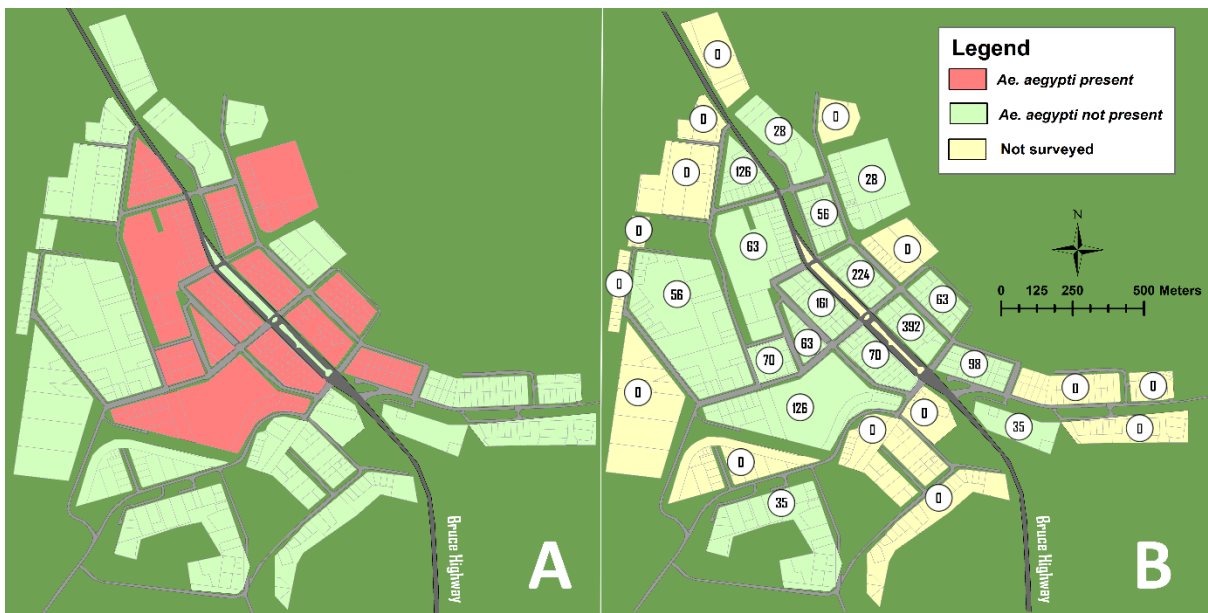

311

312 **Figure 4. Blocks surveyed for *Aedes aegypti* 2011-2015 (A) and trapping 2016-2020 (B) in Gin Gin, Australia. Circled**

313 numbers represent the cumulative number of trap days across the town from 2016-2020 suggesting the species is no longer

314 present (B).

## 315 Discussion

316 In Australia, the prevention of exotic vector-borne disease is a public health matter of national  
317 importance. A key component to understand disease transmission risk is access to data of the current  
318 distribution and abundance of vector species within different spatio-temporal scales, that range from  
319 local contact case addresses, larger environs of town or city and regional perspectives. Additionally,  
320 contemporaneous surveillance in regions that are vulnerable to stochastic invasion by urban vectors  
321 is required to enable the timely triggering of eradication campaigns as a strategy to avoid scenarios  
322 where cryptic outbreaks result from the belated recognition of covert incursions by vectors. However,  
323 the logistical challenges to obtain these data and perform eradication protocols is significant. In 2011,  
324 *Ae. aegypti* was re-detected in Gin Gin, a small regional town on a major highway into SEQ (a region  
325 which contains ~70% of Queensland's population). Infestations in towns on the margins of SEQ,  
326 particularly those that are also located on major transport pathways, increase the risk that *Ae. aegypti*  
327 could re-invade major population centres such as Brisbane (150 km further south) and transmit large  
328 epidemics of dengue (7). Gin Gin provides a case study of the sustained and concerted public health  
329 effort, involving both traditional mosquito control and innovative entomological surveillance during  
330 ~~the period~~ 2012-2020, that is required to obtain confidence that an *Ae. aegypti* population was  
331 suppressed below the level of detection in a small town. This important public health outcome  
332 demonstrates that traditional mosquito control is effective at suppressing and potentially eliminating  
333 *Ae. aegypti* populations in small towns. However, it should also serve as a warning that traditional  
334 methods may not be sustainable for larger towns and cities that will intensify both the spatial  
335 (heterogeneous distributions resulting from low dispersal behaviours) and temporal challenges  
336 (drought-resistant eggs) for surveillance sensitivity. This will be particularly difficult without  
337 investment in national capacity and capability to perform large scale interventions. The logistical  
338 resources and costs to scale our model to large urban areas (40) is significant and suggest strategic  
339 planning (20) to incursions should embed genetic analyses and additional innovative measures within

340 routine entomologic surveillance and emergency responses, and include *Wolbachia* or emergent  
341 technologies that are not insecticide based.

342 Managing the Gin Gin detection benefited from health authorities and scientists partnering to conduct  
343 regular entomological surveillance and control activities. During summer 2015/2016, the informal  
344 technical advisory group had oversight of key mosquito control activities which integrated source  
345 reduction (sealed rainwater tanks) and treatment of larval habitat with residual insecticides in the  
346 central business and residential areas of the town. This effectively suppressed the population to levels  
347 below detection thresholds by traditional surveillance methods. By late summer 2019/2020 and after  
348 four years of surveillance activities, *Ae. aegypti* was not detected in Gin Gin. The 2015/2016  
349 intervention was the culmination of sustained and concerted effort by public health authorities and  
350 the community to destabilize the *Ae. aegypti* population. This effort included several local initiatives:

- 351 1) Effective engagement with the local community, which were highly supportive of mosquito  
352 surveillance activities, and ensured ongoing compliance with health authorities;
- 353 2) Ongoing surveillance that identified key rainwater tanks acting as major urban mosquito  
354 population sources; and
- 355 3) Consistent pressure/focus from local government that identified rainwater tanks non-  
356 compliant with mosquito regulations were drained, sealed or removed which removed egg  
357 banks and ensured larval habitat was unavailable during periods of low rainfall.

358 *Aedes aegypti* was initially re-detected in a single block in northern Gin Gin during a routine larval  
359 survey. Interestingly, two similar surveys had not previously identified the species in the town. The  
360 2011 detection suggests the population may have persisted at very low levels or been recently re-  
361 introduced. Such uncertainty highlights the logistical challenges of traditional house-to-house,  
362 presence-absence surveillance for urban mosquitoes that can persist for extended periods as drought-  
363 resistant eggs. This species exhibits low movement over a lifetime (<200 m), however, *Ae. aegypti* and  
364 other anthropophilic species utilise human-mediated transportation thereby facilitating long-distance

365 dispersal (41). This long-distance dispersal may be one factor that contributed to the first detection of  
366 the species within the northern area of the town. Several reasons could be hypothesised for the 2011  
367 re-detection of the species. The positive residential block contains the local showground which hosts  
368 a constant flow of travellers who overnight in campervans. There is also a large commercial trucking  
369 stop at the northern end of Gin Gin, two blocks from the detection where large numbers of trucks stay  
370 overnight after travelling for extended periods from areas where *Ae. aegypti* is abundant. Mosquitoes  
371 may have entered a campervan or truck freight and 'hitchhiked' from northern or central Queensland  
372 to Gin Gin. Alternatively, the detection is a remnant historical population last detected in routine  
373 house-to-house surveys in 1986. The determination of point-of-origin requires access to high  
374 resolution, genomic sequencing techniques and a separate analysis is currently being undertaken on  
375 *Ae. aegypti* populations in the region.

376 A key result of the genetic analysis indicated that the *Ae. aegypti* within Gin Gin formed a  
377 homogeneous cluster with a small effective population size. The resolution of the analysis did not  
378 differentiate whether this population was newly established in 2011 or a relict population. However,  
379 the result concluded that the population is vulnerable to elimination measures given the very low level  
380 of genetic admixture, low effective population size and level of inbreeding. Furthermore, the low  
381 genetic diversity and degree of differentiation observed between the Gin Gin *Ae. aegypti* population  
382 and other Queensland samples suggest a low likelihood of reinvasion from central Queensland. These  
383 findings suggest that all new incursion events (e.g. Tennant Creek invasion of 2021) should be  
384 genetically analysed to determine whether *Ae. aegypti* genetic profiles are characterised as invasive  
385 or not. Our evidence suggests that the Gin Gin *Ae. aegypti* population was vulnerable to elimination  
386 measures. Furthermore, this genetic catalogue of the *Ae. aegypti* population is important to  
387 determine the long-term effectiveness of suppression outcomes. It will provide a definitive answer to  
388 whether future detections are from the original population or introduced from separate populations  
389 that may or may not be 'invasive'. Characterization of genotypes from all Queensland population  
390 centres will inform a point-of-origin assessment, potentially from highly invasive genotypes, within



391 SEQ and other Australian incursions. Genomic catalogues will also provide a reference point for  
392 potential breaches at international first points of entry.

393 Elimination campaigns that have used traditional forms of urban mosquito control typically involve  
394 community education, source reduction, , and residual insecticides have been effective at eliminating  
395 *Ae. aegypti* populations in Australia. For example, the first elimination campaign in Australia removed  
396 *Ae. aegypti* from Brisbane and surrounding areas during the mid-twentieth century (5) when the city  
397 population was much smaller. The species was eliminated via effective anti-mosquito regulations  
398 which targeted larval habitat such as unsealed rainwater tanks (5, 12). More recently, the species has  
399 been eliminated from the small and isolated communities of Groote Eylandt (13) and Tennant Creek  
400 (14, 42) in the Northern Territory. It is likely that Australia's low rainfall contributed to the long-term  
401 and permanent suppression of those populations. A novel method of population suppression under  
402 low rainfall conditions is the application of *Wolbachia* that exploits the deleterious effects of certain  
403 strains (27, 43). This strategy utilizes the loss of desiccation resistance in *Aedes* eggs to eliminate a  
404 population over extended dry periods. This 'replace and suppress' strategy would not only prevent  
405 dengue transmission, but is likely to be highly effective for suppressing, populations in large urban  
406 settings that will otherwise prove difficult logistically to inspect and treat with insecticides,  
407 exacerbated by non-treatment of cryptic larval habitat (44). Utilizing the wet-dry seasonal dynamic of  
408 Australian landscapes will be important to future campaigns which seek to eliminate populations of  
409 container inhabiting vectors like *Ae. aegypti* and *Ae. albopictus*.

410 In Queensland, the prevention of dengue and controlling vector species is the shared responsibility of  
411 both state and local government organisations. Queensland Health has the overall responsibility  
412 under the *Public Health Act 2005* for the control of communicable diseases in Queensland, including  
413 exotic mosquito-borne diseases such as dengue fever. Provisions within Chapter 2 of the *Public Health*  
414 *Act 2005* provide local governments with the statutory support and powers to undertake mosquito  
415 surveillance and control activities (via insecticide treatment) and to prevent and control public health

416 risks in relation to mosquitoes within residents' premises. This involves the Queensland Health chief  
417 executive sanctioning an authorised prevention and control program when an area is likely to contain  
418 an infestation of a disease vector such as *Ae. aegypti* or risk of an outbreak of vector-borne disease.  
419 For example, unmaintained rainwater tanks can be made to comply with the *Public Health Regulation*  
420 *2005* and *Public Health Act 2005* by local authorities, so they no longer function as larval habitat for  
421 *Ae. aegypti* or other mosquito species. These essential powers were drawn upon during the period  
422 2011-2020 to ensure residents in Gin Gin did not continue to store or removed containers where *Ae.*  
423 *aegypti* was present. Importantly however, the logistical challenge for health authorities to access and  
424 eliminate mosquitoes in all homes and businesses during control activities in very large towns and  
425 cities using chemical models of elimination is immense. Thus, a central element of urban mosquito  
426 control is to raise awareness about the community's role to adopt behaviours that eliminate mosquito  
427 breeding at home and in the workplace. Concurrent investment is required to provide baseline  
428 monitoring programs that are more representative of the spatio-temporal parameters of urban  
429 mosquitoes to establish entomological confidence in a negative result for invasive species. Current  
430 use of surveillance programs that increase throughput and sensitivity by the use of molecular  
431 diagnostic platforms (RSVP) and that can be linked to citizen science platforms (Mozzie Monitors (45)  
432 and Zika Mozzie Seeker (46)) can provide opportunities to further increase sampling frequency and  
433 site number will inform a detection threshold.

434 Establishing and maintaining community support in Gin Gin was essential to the success of urban  
435 mosquito control and dengue prevention initiatives. An effective engagement strategy sets objectives  
436 and defines the underlying activities that will best meet these objectives and those of the project.  
437 Utilizing council and health officers from the local community promoted and encouraged local  
438 acceptance, ownership of the project's goals, and facilitated entomologic surveillance and control  
439 activities. Trust is an important element of community engagement which must be established and  
440 maintained to ensure community support throughout the life of the intervention. The formation of a  
441 community reference group during 2015-2016, was essential to building trust during the intervention

442 when rainwater tanks were sealed, and insecticides utilized for suppression. A community reference  
443 group can provide a social licence to operate and facilitates the transfer of information from scientists  
444 or health authorities to the community or opportunities for community concerns to be voiced. Efforts  
445 to ensure a comprehensive engagement strategy can foster increased community acceptance, provide  
446 local support for activities and even some level of ownership as it promotes both enthusiasm within  
447 the community and adherence to personal behaviours. Effective acts that reduce urban mosquito  
448 breeding sites in residential premises and significantly reduce the vulnerability of individuals and  
449 community to invasive urban species and associated diseases.

## 450 Conclusion

451 The extensive public health efforts documented here demonstrate that an integration of traditional  
452 mosquito control, a small genetically isolated mosquito population and public engagement can  
453 eliminate *Ae. aegypti* from a small regional town. Replicating this model for large towns and cities at  
454 appropriate spatial-temporal scales that will provide an early warning capability and monitor the  
455 efficacy and longevity of suppression activities may prove extremely difficult to sustain without  
456 incorporating innovative solutions. Removing vectors from a region is a strategic solution to  
457 preventing disease transmission. Re-emergence of dengue in Rockhampton after 60 years is a  
458 reminder that wild-type populations of *Ae. aegypti* in Queensland still represent a risk of disease  
459 transmission. While SEQ region is currently considered vector-free, this Gin Gin case study  
460 demonstrates that there is cause for caution. Detection thresholds are insensitive throughout much  
461 of the region and stochastic incursions risks remain via freight connections with established *Ae.*  
462 *aegypti* Queensland populations, and increased interceptions at international First Ports of Entry  
463 (airports and seaports). This regional risk is heightened by over 300,000 rainwater tanks installed  
464 throughout SEQ which are generally unmonitored by authorities and are approaching the end of their  
465 warranty periods. Engaging communities to participate in surveillance (citizen science) may also  
466 encourage broader awareness and adoption of personal behaviours that reduce availability of

467 residential and commercial sites to urban mosquito species that will also reduce regional vulnerability  
468 to invasive species and associated risk of exotic diseases, particularly in regions with a high number of  
469 viraemic travellers and/or proximal to ports of entry. Application of the Gin Gin model to large towns  
470 and urban cities of SEQ and Australia will require significant investment in national capacity and  
471 capability. Robust and contemporaneous urban mosquito surveillance programs are required that are  
472 expansive and sustainable to provide the level of sensitivity required to provide regional confidence  
473 that towns and cities are absent of vectors and sensitive enough to detect incursions (that may be  
474 focal for many years) relatively quickly. This capability is enhanced by linking surveillance methods to  
475 molecular diagnostic methods to develop genetic reference libraries to define species identification,  
476 point-of-origin and insecticide resistance. In turn, this investment will build essential experience and  
477 baseline monitoring data that will inform elimination strategies if invasive vectors such as *Ae. aegypti*  
478 or *Ae. albopictus* are detected in major Australian cities.

479

## 480 **Acknowledgements**

481 We would like to thank all current and past staff at the Bundaberg Regional Council who assisted with  
482 mosquito trapping and community engagement. We would like to acknowledge the community of Gin  
483 Gin for their enthusiasm and support in all surveillance and control activities undertaken within the  
484 town.

## 485 **Supporting Information**

486 **S1 Appendix. Queensland Health Report: Population suppression of *Aedes aegypti* in Gin Gin,  
487 Bundaberg, Queensland. (re distributed through a Creative Commons Attribution 3.0 Australia  
488 licence).**

489 **S2 Appendix. Community Engagement Plan**

490 **S3 Appendix. Risk Management Strategy**

491 **S4 Appendix. Mosquito Suppression Plan**

492 **S5 Appendix. T1. Samples of *Aedes aegypti* larvae. T2. Number of genetic clusters assigned by**

493 **STRUCTURE of *Aedes aegypti* from Gin Gin, Queensland. F1. Genetic clusters assigned by**

494 **STRUCTURE for samples of *Aedes aegypti* from Queensland, Australia.**

495 **S6 Appendix. *Aedes aegypti* positive residential blocks in Gin Gin, Queensland F1. 2012-2013, F2.**

496 **2013-2014, F3. 2014-2015, F4. 2015-2016, F5. 2017-2018, F6. 2018-2019, F7. 2019-2020.**

497 **Data reporting**

498 The datasets supporting the conclusions of this article are included within the article (and its additional  
499 files).

500 **Financial Disclosure Statement**

501 Bundaberg Regional Council provided funding for the genetic study. NMEH was supported by

502 NHMRC program grants 1037003 & 1132412.

503 **Competing interests**

504 There are no competing interests, whether they be financial, personal or professional, that have  
505 influenced the work.

506 **Human and animal research**

507 Human ethics approval for the 2015-2016 community engagement, mosquito suppression and  
508 research was provided by the CSIRO Health and Medical Research Human Research Ethics Committee  
509 (Proposal #12/2015) and QIMR Berghofer Human Ethics Committee (#P2054).

510 **References**

- 511 1. WHO. Global Strategy For Dengue Prevention and Control 2012 to 2020. Geneva,  
512 Switzerland: World Health Organization; 2012.
- 513 2. Bhatt S, Gething PW, Brady OJ, Messina JP, Farlow AW, Moyes CL, et al. The global  
514 distribution and burden of dengue. *Nature*. 2013;496(7446):504-7.

- 515 3. Ferreira-de-Brito A, Ribeiro IP, Miranda RMd, Fernandes RS, Campos SS, Silva KABd, et al.  
516 First detection of natural infection of *Aedes aegypti* with Zika virus in Brazil and throughout South  
517 America. Mem Inst Oswaldo Cruz. 2016;111:655-8.
- 518 4. Christophers S. *Aedes aegypti* (L.) The Yellow Fever Mosquito: Its Life History Bionomics and  
519 Structure: London : The Syndics of the Cambridge University Press, Bentley House, 200, Euston Road,  
520 N.W.I.; 1960. xii + 739 pp. p.
- 521 5. Trewin BJ, Darbro JM, Jansen CC, Schellhorn NA, Zalucki MP, Hurst TP, et al. The elimination  
522 of the dengue vector, *Aedes aegypti*, from Brisbane, Australia: The role of surveillance, larval habitat  
523 removal and policy. PLOS Negl Trop Dis. 2017;11(8):e0005848.
- 524 6. Maynard AJ. Invasion history and evolution of the Asian tiger mosquito *Aedes albopictus*  
525 (Skuse, 1894) and yellow fever mosquito *Aedes aegypti* (Linnaeus, 1762) in the Indo-Pacific.  
526 Brisbane, Australia: University of Queensland; 2020.
- 527 7. Lumley GF, Taylor FH. Dengue: School of Public Health and Tropical Medicine (University of  
528 Sydney); 1943.
- 529 8. Kay B, Barker-Hudson P, Stallman N, Wiemers M, Marks E, Holt P, et al. Dengue fever.  
530 Reappearance in northern Queensland after 26 years. Med J Aust. 1984;140(5):264-8.
- 531 9. Hoffmann AA, Montgomery BL, Popovici J, Iturbe-Ormaetxe I, Johnson PH, Muzzi F, et al.  
532 Successful establishment of *Wolbachia* in *Aedes* populations to suppress dengue transmission.  
533 Nature. 2011;476(7361):454-7.
- 534 10. Ryan PA, Turley AP, Wilson G, Hurst TP, Retzki K, Brown-Kenyon J, et al. Establishment of  
535 wMel *Wolbachia* in *Aedes aegypti* mosquitoes and reduction of local dengue transmission in Cairns  
536 and surrounding locations in northern Queensland, Australia. Gates Open Res. 2020;3:1547-.
- 537 11. State of Queensland. Queensland Dengue Management Plan 2015-2020. In: Branch CD,  
538 editor. 15 Butterfield St, Herston Qld 4006, Fortitude Valley BC 4006: Queensland Health; 2015. p.  
539 62.
- 540 12. Russell RC, Currie BJ, Lindsay MD, Mackenzie JS, Ritchie SA, Whelan PI. Dengue and climate  
541 change in Australia: predictions for the future should incorporate knowledge from the past. Med J  
542 Aust. 2009;190(5):265-8.
- 543 13. Whelan PI, Kulbac M, Bowbridge D, Krause V. The eradication of *Aedes aegypti* from Groote  
544 Eylandt NT Australia 2006-2008. Queensland Institute of Medical Research, Arbovirus Research in  
545 Australia (10). 2009.
- 546 14. Whelan PI, Kurucz N, Pettit WJ, Krause V. Elimination of *Aedes aegypti* in northern Australia,  
547 2004–2006. J Vector Ecol. 2020;45(1):118-26.
- 548 15. Doherty R. Clinical and epidemiological observations on dengue fever in Queensland, 1954-  
549 1955. Med J Aust. 1957;44(22):753.
- 550 16. Webb CE. After decades away, dengue returns to central Queensland The Conversation2019  
551 [Available from: <https://theconversation.com/after-decades-away-dengue-returns-to-central-queensland-117821>.  
552
- 553 17. Ross PA, Wiwatanaratanabutr I, Axford JK, White VL, Endersby-Harshman NM, Hoffmann AA.  
554 *Wolbachia* Infections in *Aedes aegypti* Differ Markedly in Their Response to Cyclical Heat Stress. PLoS  
555 Pathog. 2017;13(1):e1006006-e.
- 556 18. Mancini MV, Ant TH, Herd CS, Gingell DD, Murdochy SM, Mararo E, et al. High temperature  
557 cycles result in maternal transmission and dengue infection differences between *Wolbachia* strains  
558 in *Aedes aegypti*. bioRxiv. 2020:2020.11.25.397604.
- 559 19. Trewin B. Assessing the risk of establishment by the dengue vector, *Aedes aegypti*  
560 (L.)(Diptera: Culicidae), through rainwater tanks in Queensland: back to the future. Brisbane:  
561 University of Queensland; 2018.
- 562 20. Health Q. Framework for Risk Assessment and Response for Incursion of Exotic Mosquitoes  
563 into a New Location in Queensland. In: Branch CD, editor. Herston, Queensland: Queensland health;  
564 2020. p. 37.

- 565 21. Australian Bureau of Statistics. Regional Population Growth, Australia, 2015-16 2016  
566 [Available from: <http://www.abs.gov.au/AUSSTATS/abs@.nsf/DetailsPage/3218.02015->  
567 16?OpenDocument.
- 568 22. Public Health Act. Public Health Act 2005. Queensland: State of Queensland; 2005.
- 569 23. Public Health Act. Public Health Act – Mosquitos and the Public Health Regulation 2005. In:  
570 Government TQ, editor. 2005.
- 571 24. Williams CR, Long SA, Russell RC, Ritchie SA. Field efficacy of the BG-Sentinel compared with  
572 CDC Backpack Aspirators and CO<sub>2</sub>-baited EVS traps for collection of adult *Aedes aegypti* in Cairns,  
573 Queensland, Australia. *J Am Mosq Control Assoc.* 2006;22(2):296-300.
- 574 25. Tun-Lin W, Kay B, Barnes A. The premise condition index: a tool for streamlining surveys of  
575 *Aedes aegypti*. *Am J Trop Med. Hyg.* 1995;53(6):591-4.
- 576 26. Williams CR, Ritchie SA, Long SA, Dennison N, Russell RC. Impact of a Bifenthrin-Treated  
577 Lethal Ovitrap on *Aedes aegypti* Oviposition and Mortality in North Queensland, Australia. *J Med*  
578 *Ent.* 2007;44(2):256-62.
- 579 27. Rasic G, Endersby NM, Williams C, Hoffmann AA. Using *Wolbachia*-based release for  
580 suppression of *Aedes* mosquitoes: insights from genetic data and population simulations. *Ecol Appl.*  
581 2014;24(5):1226-34.
- 582 28. Pritchard JK, Stephens M, Donnelly P. Inference of population structure using multilocus  
583 genotype data. *Genetics.* 2000;155:945-59.
- 584 29. Evanno G, Regnaut S, Goudet J. Detecting the number of clusters of individuals using the  
585 software STRUCTURE: a simulation study. *Mol Ecol.* 2005;14:2611-20.
- 586 30. Ritchie SA, Buhagiar TS, Townsend M, Hoffmann A, Van Den Hurk AF, McMahon JL, et al.  
587 Field validation of the gravid *Aedes* trap (GAT) for collection of *Aedes aegypti* (Diptera: Culicidae). *J*  
588 *Med Ent.* 2014;51(1):210-9.
- 589 31. Knox TB, Yen NT, Nam VS, Gatton ML, Kay BH, Ryan PA. Critical evaluation of quantitative  
590 sampling methods for *Aedes aegypti* (Diptera: Culicidae) immatures in water storage containers in  
591 Vietnam. *J Med Ent.* 2007;44(2):192-204.
- 592 32. Ritchie SA. Effect of some animal feeds and oviposition substrates on *Aedes* oviposition in  
593 ovitraps in Cairns, Australia. *J Am Mosq Control Assoc.* 2001;17(3):206-8.
- 594 33. Marks EN. An atlas of common Queensland mosquitoes: University of Queensland  
595 Bookshop; 1967.
- 596 34. Trewin BJ, Pagendam DE, Zalucki MP, Darbro JM, Devine GJ, Jansen CC, et al. Urban  
597 Landscape Features Influence the Movement and Distribution of the Australian Container-Inhabiting  
598 Mosquito Vectors *Aedes aegypti* (Diptera: Culicidae) and *Aedes notoscriptus* (Diptera: Culicidae). *J*  
599 *Med Ent.* 2020;57(2):443-53.
- 600 35. Ritchie S, Hanna J, Hills S, Piispanen J, McBride W, Pyke A, et al. Dengue Control in North  
601 Queensland, Australia: Case Recognition and Selective Indoor Residual Spraying. *Dengue Bull.*  
602 2002;26:7-13.
- 603 36. Montgomery BL, Shivas MA, Hall-Mendelin S, Edwards J, Hamilton NA, Jansen CC, et al.  
604 Rapid Surveillance for Vector Presence (RSVP): Development of a novel system for detecting *Aedes*  
605 *aegypti* and *Aedes albopictus*. *PLOS Negl Trop Dis.* 2017;11(3):e0005505.
- 606 37. Department of Resources. Cadastral data - Queensland series. In: Government Q, editor.  
607 6.13 ed. Open Data Portal2021.
- 608 38. Programme C. Copernicus Australasia Regional Data Hub [Available from:  
609 <http://www.copernicus.gov.au>.
- 610 39. Silver JB. Mosquito Ecology: Field Sampling Methods. 3rd Edition ed: Springer; 2008.
- 611 40. Darbro J, Halasa Y, Montgomery B, Muller M, Shepard D, Devine G, et al. An Economic  
612 Analysis of the Threats Posed by the Establishment of *Aedes albopictus* in Brisbane, Queensland. *Ecol*  
613 *Econ.* 2017;142:203-13.

- 614 41. Damal K, Murrell EG, Juliano SA, Conn JE, Loew SS. Phylogeography of *Aedes aegypti* (Yellow  
615 Fever Mosquito) in South Florida: mtDNA Evidence for Human-Aided Dispersal. *Am J Trop Med Hyg.*  
616 2013;89(3):482-8.
- 617 42. Whelan PI, Pettit WJ, Krause V. Dengue mosquito incursion into Tennant Creek, 2011. *Dis*  
618 *Cont Bull* 2012;19(1):16-21.
- 619 43. Ritchie SA, Townsend M, Paton CJ, Callahan AG, Hoffmann AA. Application of *wMelPop*  
620 *Wolbachia* Strain to Crash Local Populations of *Aedes aegypti*. *PLOS Negl Trop Dis.*  
621 2015;9(7):e0003930.
- 622 44. Russell B, Kay B, Shipton W. Survival of *Aedes aegypti* (Diptera: Culicidae) eggs in surface and  
623 subterranean breeding sites during the northern Queensland dry season. *J Med Ent.* 2001;38(3):441-  
624 5.
- 625 45. Braz Sousa L, Fricker SR, Doherty SS, Webb CE, Baldock KL, Williams CR. Citizen science and  
626 smartphone e-entomology enables low-cost upscaling of mosquito surveillance. *Science of The Total*  
627 *Environment.* 2020;704:135349.
- 628 46. Ritchie SA, Staunton KM. Reflections from an old Queenslander: can rear and release  
629 strategies be the next great era of vector control? *Proc Royal Soc B.* 2019;286(1905):20190973-.

630

631



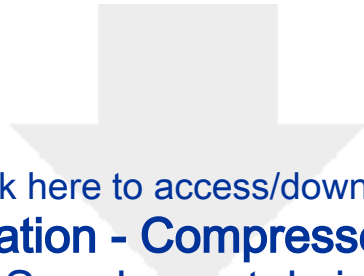

[Click here to access/download](#)

**Supporting Information - Compressed/ZIP File Archive  
Supplemental.zip**

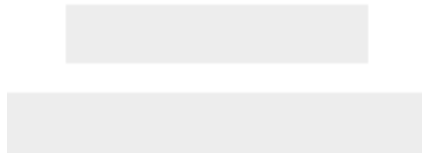

Supplement: pntd.0010243.s006.pdf [file pntd.0010243.s006.pdf]
