# Supplementary material for: Extensive public health initiatives drive the elimination of Aedes aegypti (Diptera, Culicidae) from a town in regional Queensland: A case study from Gin Gin, Australia
Source: PubMed Central journal article supplement (PMC9020727; doi:10.1371/journal.pntd.0010243), 2022-04-08
Supplement: pntd.0010243.s005.pdf [file pntd.0010243.s005.pdf]

**Table A.** Samples of *Aedes aegypti* larvae for genetic analysis taken from Gin Gin, Queensland during summer 2012/13.

| Sample No. | Container         | Number |
|------------|-------------------|--------|
| 10622      | Bucket            | 1      |
| 10659      | Bucket            | 2      |
| 16993      | Cup               | 3      |
| 16980      | Ice Cream Tub     | 3      |
| 10542      | Ice Cream Tub     | 3      |
| 16985      | Pool              | 1      |
| 10588      | 20 L Drum         | 3      |
| 10574      | Pot & Base        | 1      |
| 18320      | Pot & Base        | 2      |
| 10559      | Pot & Base        | 1      |
| 10676      | Esky              | 3      |
| 10649      | Dog Bowl          | 1      |
| 10661      | Kettle            | 3      |
| 10664      | Galvanised Tank   | 1      |
| 18341      | Self Watering Pot | 1      |
| 16911      | Tyre              | 1      |
| 10553      | Tyre              | 1      |
| 16923      | Ice Cream tub     | 1      |
| 16957      | Dog Bowl          | 3      |
| 14200      | Pot               | 3      |
| 16950      | Drum Lid          | 1      |

**Table B.** Number of genetic clusters (K) assigned by STRUCTURE in a sample of *Aedes aegypti* from Gin Gin, Queensland, Australia.

| # K      | Reps     | Mean LnP(K)       | Stdev LnP(K)   | Ln'(K)           | Ln''(K)          | Delta K         |
|----------|----------|-------------------|----------------|------------------|------------------|-----------------|
| 1        | 5        | -3954.1200        | 0.0447         | NA               | NA               | NA              |
| 2        | 5        | -3856.9000        | 20.4043        | 97.220000        | 42.520000        | 2.083876        |
| 3        | 5        | -3802.2000        | 29.8582        | 54.700000        | 1.220000         | 0.040860        |
| 4        | 5        | -3748.7200        | 15.4135        | 53.480000        | 35.500000        | 2.303171        |
| 5        | 5        | -3730.7400        | 16.3497        | 17.980000        | 17.760000        | 1.086258        |
| <b>6</b> | <b>5</b> | <b>-3695.0000</b> | <b>18.8654</b> | <b>35.740000</b> | <b>71.800000</b> | <b>3.805900</b> |
| 7        | 5        | -3731.0600        | 22.9265        | -36.060000       | 37.760000        | 1.647005        |
| 8        | 5        | -3729.3600        | 30.4429        | 1.700000         | NA               | NA              |

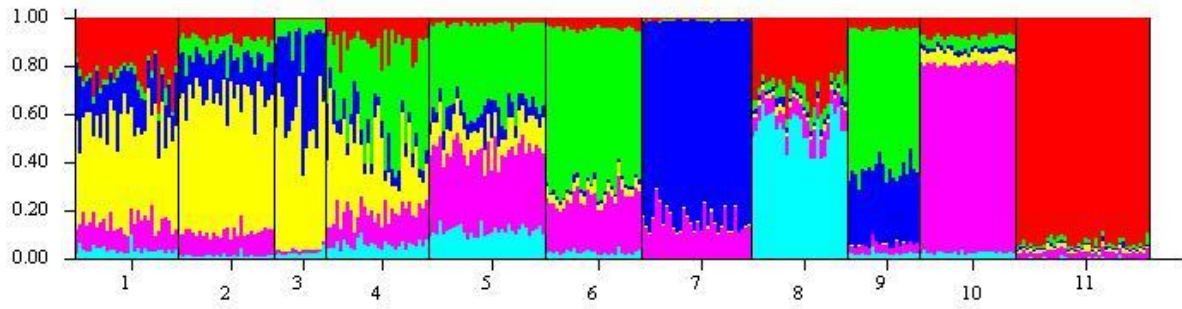

**Figure A.** Genetic clusters assigned by STRUCTURE for samples of *Aedes aegypti* from Queensland, Australia (1=Yorkeys Knob, 2=Gordonvale, 3=Ingham, 4=Rockhampton, 5=Mt Morgan, 6=Duaranga, 7=Bluff, 8=Emerald, 9=Capella, 10=Longreach, 11=Gin Gin)
